# Supplementary material
Source: publisher site journal article supplement (https://www.dovepress.com/article/246957)
Supplement: Supplementary file 1 [file get_supplementary_file.php]

Supplementary Table 1. Clinical information of breast cancer patients.

| Characteristics | patients |
| --- | --- |
| Age (years) |  |
| ＜50 | 37 |
| ≥50 | 83 |
| BMI | 23±6.33 |
| TNM stage |  |
| I | 25 |
| II-III | 95 |
| Tumor size (cm) |  |
| ≤2 | 22 |
| > 2 | 98 |
